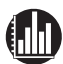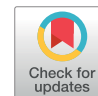

# Effect of a Behavioral Weight Loss Intervention in People With Serious Mental Illness and Diabetes

Diabetes Care 2019;42:804–809 | <https://doi.org/10.2337/dc18-2201>

Eva Tseng,<sup>1,2</sup> Arlene T. Dalcin,<sup>1,2</sup>  
Gerald J. Jerome,<sup>3</sup> Joseph V. Gennusa,<sup>1</sup>  
Stacy Goldsholl,<sup>1</sup> Courtney Cook,<sup>1</sup>  
Lawrence J. Appel,<sup>1,2,4</sup>  
Nisa M. Maruthur,<sup>1,2,4</sup> Gail L. Daumit,<sup>1,2,5–7</sup>  
and Nae-Yuh Wang<sup>1,2,4,8</sup>

## OBJECTIVE

Given the high prevalence of obesity and diabetes in patients with serious mental illness (SMI) and the lack of evidence on the effects of weight loss programs in SMI patients with diabetes, we evaluated the effectiveness of a behavioral weight loss intervention among SMI participants with and without diabetes.

## RESEARCH DESIGN AND METHODS

Using data from ACHIEVE, a randomized controlled trial to evaluate the effects of a behavioral weight loss intervention among overweight/obese people with SMI, we assessed and compared weight change from baseline to 18 months in participants with and without diabetes using a longitudinal mixed-effects model.

## RESULTS

Of the 291 trial participants, 82 (28.2%) participants had diabetes (34 and 48 in intervention and control groups, respectively) at baseline. Participants with diabetes were more likely to be taking antipsychotics (31.7% vs. 18.7%,  $P = 0.02$ ). At 18 months, participants in the control group with diabetes lost 1.2 lb (0.6%) of body weight compared with 0.8 lb (0.7%) among those without diabetes. In the intervention group, participants with diabetes lost 13.7 lb (6.6%) of their initial body weight compared with 5.4 lb (2.9%) for those without diabetes. Corresponding net effects (intervention minus control) were 4.6 lb (2.2%) and 12.5 lb (6.0%) net weight reduction over 18 months in the no diabetes and the diabetes subgroups, respectively. However, the between-group difference in intervention effects was statistically nonsignificant (absolute weight change:  $P$ -interaction = 0.08; % weight change:  $P$ -interaction = 0.10).

## CONCLUSIONS

A behavioral weight loss intervention is effective among overweight and obese individuals with SMI regardless of their diabetes status.

People with serious mental illness (SMI) have an extremely high prevalence of obesity that is nearly double that of the general population (1). Furthermore, although the prevalence of diagnosed type 2 diabetes in this vulnerable population is ~12% (2), up to 70% of cases of diabetes in this population are undiagnosed (3,4). People with SMI who have diabetes have a higher rate of complications due to microvascular and macrovascular complications and deaths related to diabetes compared with people without SMI who have diabetes (4). Most antipsychotic medications are associated

<sup>1</sup>Division of General Internal Medicine, The Johns Hopkins University School of Medicine, Baltimore, MD

<sup>2</sup>Welch Center for Prevention, Epidemiology, and Clinical Research, The Johns Hopkins University, Baltimore, MD

<sup>3</sup>Towson University, Baltimore, MD

<sup>4</sup>Department of Epidemiology, The Johns Hopkins University Bloomberg School of Public Health, Baltimore, MD

<sup>5</sup>Department of Psychiatry and Behavioral Sciences, The Johns Hopkins University School of Medicine, Baltimore, MD

<sup>6</sup>Department of Health Policy and Management, The Johns Hopkins University Bloomberg School of Public Health, Baltimore, MD

<sup>7</sup>Department of Mental Health, The Johns Hopkins University Bloomberg School of Public Health, Baltimore, MD

<sup>8</sup>Department of Biostatistics, The Johns Hopkins University Bloomberg School of Public Health, Baltimore, MD

Corresponding author: Eva Tseng, [etseng3@jhmi.edu](mailto:etseng3@jhmi.edu)

Received 22 October 2018 and accepted 21 January 2019

This article contains Supplementary Data online at <http://care.diabetesjournals.org/lookup/suppl/doi:10.2337/dc18-2201/-/DC1>.

G.L.D. and N.-Y.W. are co-senior authors.

© 2019 by the American Diabetes Association. Readers may use this article as long as the work is properly cited, the use is educational and not for profit, and the work is not altered. More information is available at <http://www.diabetesjournals.org/content/license>.

with weight gain, and some second-generation antipsychotics affect glucose metabolism, leading to glucose intolerance and diabetes (1). Moreover, people with SMI are more likely to be sedentary, smoke, and consume poor quality diets, which increase their risk of obesity and/or diabetes (5). Some evidence also indicates that metabolic abnormalities are present in people with SMI even before treatment (6,7).

Weight loss is recommended for people with diabetes who are overweight or obese because it can reduce medication therapy and improve glycemic control and quality of life (8). However, weight loss may be more difficult for people with diabetes because some diabetes medications cause weight gain. Additionally, initiating treatment and improved glycemic control can lead to a decline in energy expenditure due to decreased protein turnover and a decline in metabolic rate, both of which counteract weight loss (9). Studies examining whether people with diabetes are as successful in a behavioral weight loss intervention compared with people without diabetes have shown inconsistent results, with some studies showing that individuals with diabetes lose less weight in a behavioral weight loss intervention compared with individuals without diabetes (10,11), whereas other studies have shown that weight loss is similar among those with and without diabetes (12–15) or even greater among people with diabetes (16).

The Randomized Trial of Achieving Healthy Lifestyles in Psychiatric Rehabilitation (ACHIEVE) was the first long-term randomized controlled trial to evaluate the effects of a behavioral weight loss intervention among overweight/obese people with SMI. In the main findings, the intervention group lost significantly more weight (net difference in change of 7 lb) than the control group at 18 months follow-up (17). To our knowledge, no studies to date have examined the success of people with SMI who have diabetes in weight loss interventions.

Given the higher prevalence of diabetes and obesity and risk factors for these conditions among people with SMI and lack of evidence on the effect of behavioral weight loss interventions for people with SMI with and without diabetes, we used data from the ACHIEVE trial to 1) evaluate the effectiveness of a

behavioral weight loss intervention for people with SMI separately, in those with diabetes and without diabetes, and 2) explore potential heterogeneity of treatment effect between these two subgroups.

## RESEARCH DESIGN AND METHODS

### ACHIEVE Trial Design

The ACHIEVE trial recruited overweight or obese adults between January 2009 and February 2011 who attended 1 of 10 community outpatient psychiatric rehabilitation programs in Maryland or their affiliated outpatient mental health clinics (17). Exclusion criteria included a medical contraindication to weight loss, cardiovascular event in prior 6 months, inability to walk, or an active alcohol use or substance use disorder (see previous publication for full details) (17,18). A total of 291 participants were randomly assigned to the control or intervention group. The intervention was a behavioral weight loss program that included three types of contact: group weight-management sessions, individual weight-management sessions, and group exercise sessions. The control group received standard nutrition and physical activity information at baseline and was offered health classes quarterly. The main outcome of the ACHIEVE trial was change in weight from randomization to 6 months and 18 months.

### Primary Outcome: Weight Change Over 18 Months

The primary outcome for this secondary data analysis was absolute weight change from baseline to 18 months. Weight was measured at baseline and 6, 12, and 18 months using a calibrated, high-quality digital scale, with the participant wearing light indoor clothing without shoes. The intervention effect on body weight is defined as the net 18-month weight change, i.e., the difference in 18-month weight change between the intervention and control group.

### Secondary Outcomes: Change in and Glucose Waist Circumference

We also examined change in fasting glucose and waist circumference from baseline to 18 months. Fasting glucose was measured at baseline and 6 and 18 months. Participants were required to be fasting at least 8 h prior to the laboratory measurement. Waist circumference was measured in centimeters

by trained staff at baseline and 6 and 18 months. The intervention effect on these outcomes is defined as the net 18-month change of these outcomes, i.e., the difference in 18-month outcome changes between the intervention and control group.

### Potential Effect Modifiers

We classified participants as having diabetes at baseline if they self-reported a diagnosis of diabetes, had a fasting glucose level  $\geq 126$  mg/dL, or reported use of any glucose-lowering medication (e.g., metformin or insulin). We classified participants as having prediabetes if they had a fasting glucose level of 100–125 mg/dL, did not self-report a diabetes diagnosis, and were not on a glucose-lowering medication. In the main analyses, we compared response to the intervention through examining the net 18-month weight changes by the presence or absence of diabetes. In further exploratory analyses, we also evaluated intervention effects by the status of no prediabetes or diabetes, prediabetes, and diabetes.

### Statistical Analysis

We compared the weight at baseline and 18 months cross-sectionally by diabetes status using Student *t* tests, and percent achieving 5% weight loss at 18 months by diabetes status using a  $\chi^2$  test. Then we assessed the association between diabetes status and the intervention effect on weight change from baseline to 18 months using a longitudinal mixed-effects model. We used a repeated-measures model for visit-specific weight, including visit indicators (6, 12, and 18 months), randomization assignment indicator, and their cross-product interaction terms, adjusting for age, site, and sex. A  $4 \times 4$  unstructured variance-covariance matrix was used in this likelihood-based base model to allow different outcome variances at different time points, and to address the correlations among outcome measures over time within participants. Missing weight data were included using the software-designated missing indicator. In this base model, the overall mean intervention effect on 18-month weight change was estimated through the regression coefficient of the cross-product interaction term of the 18-month visit and the intervention indicators.

To assess for heterogeneity in intervention effects by diabetes status, we

included a diabetes indicator and its relevant interaction terms to the base model. In this unified subgroup analysis model, the regression coefficient of the two-way interaction term of the 18-month visit by intervention group indicators estimates the mean intervention effect on 18-month weight change for people with SMI and without diabetes, whereas the three-way interaction term of diabetes by intervention by 18-month visit explored the mean difference in the net intervention effects between the with and without diabetes subgroups. Natural log-transformed weight outcomes were modeled similarly to produce percent weight change estimates over 18 months.

We also used a similar longitudinal mixed-effects model to assess the association between diabetes status and intervention effect on change in fasting glucose and change in waist circumference from baseline to 18 months. Time-dependent weight was further included to investigate potential intervention effects on fasting glucose and waist circumference not mediated through weight changes. We conducted sensitivity analyses to evaluate potential impacts of missing data using the model-based analyses with inverse weighting of propensity scores.

In addition to evaluating differences in response to the intervention by the presence or absence of diabetes, we also compared weight loss across the following categories: diabetes, prediabetes, and no prediabetes or diabetes. We additionally conducted a sensitivity analysis to evaluate the impact due to misclassification of participants as having diabetes. In this analysis, we removed individuals defined as having diabetes based on only self-report without meeting the other possible criteria (fasting glucose level  $\geq 126$  mg/dL or use of any diabetes medications). Finally, we examined in the intervention group the difference between those with and without diabetes in terms of participation in the total number of intervention sessions (individual and group) using Student *t* tests. Descriptive analyses were conducted using STATA 15.1, and longitudinal mixed-effects models were analyzed using SAS Studio.

## RESULTS

Of the 291 participants, 82 (28.2%) individuals had diabetes (34 and 48 in the intervention and control groups,

respectively), and 63 (21.7%) had prediabetes at baseline. There were no differences between those with and without diabetes for sex, race/ethnicity, health insurance, presence of care provider, and randomization group assignment (Table 1 and Supplementary Table 1). Those with diabetes tended to be older (48.4 vs. 44.1 years,  $P = 0.004$ ), weigh more (239.3 vs. 220.4 lb,  $P = 0.001$ ), and have less education (25.4% vs. 41.5% graduated from high school,  $P = 0.02$ ). Participants with diabetes were more likely to have schizophrenia (43.9% vs. 23.4%, overall  $P = 0.002$ ) and be on olanzapine or clozapine (31.7% vs. 18.7%,  $P = 0.02$ ). There were no differences between the two groups in terms of psychiatric symptom measures (Behavioral and Symptom Identification Scale-24 [BASIS-24] and Center for Epidemiologic Studies-Depression [CES-D] scores).

At 18 months follow-up, participants in the control group with diabetes lost 1.2 lb (0.6%) of body weight compared with 0.8 lb (0.7%) among those without diabetes (Table 2). In the intervention group, participants with diabetes lost 13.7 lb (6.6%) of their initial body weight compared with 5.4 lb (2.9%) for those without diabetes. Overall, net weight reduction (active intervention minus control) over 18 months was 4.6 lb (2.2%) among those without diabetes and 12.5 lb (6.0%) among those with diabetes. However, the difference in intervention effects between the two subgroups was statistically nonsignificant (absolute weight change:  $P$ -interaction = 0.08; % weight change:  $P$ -interaction = 0.10).

For fasting glucose, we found that those with diabetes in the intervention group improved their glycemic control (reduction of mean fasting glucose by 14 mg/dL) compared with those with diabetes in the control group (increase of mean fasting glucose by 3 mg/dL), although the net intervention effect ( $-17$  mg/dL,  $P = 0.30$ ) was not statistically significant (Table 3). A smaller and nonstatistically significant net reduction estimate was observed in the no diabetes group. We also found a decrease in waist circumference among those with diabetes in the intervention group compared with the control group ( $-3.3$  cm vs.  $+0.1$  cm), but this difference was also not statistically different (Table 3). The differences in intervention effects

on fasting glucose and waist circumference between the two subgroups were not statistically significant (Table 3).

The probability of missing data at 18 months for body weight and weight-related outcomes were not related to the values of the same outcome observed at earlier follow-up visits or at baseline (data not shown). Given the high within-person correlation among body weights and weight-related outcomes observed over time, this finding suggested missing at random as a reasonable assumption for missing data mechanism. Sensitivity analyses using inverse weighting of propensity scores were conducted and showed similar results (data not shown) for the intervention effects presented here.

In considering three categories of diabetes status (no prediabetes or diabetes, prediabetes, and diabetes), we found that participants with prediabetes had a similar response in weight loss compared with individuals without diabetes (data not shown). In our sensitivity analysis, 12 individuals were reclassified as not having diabetes because they only self-reported diabetes, i.e., they did not meet other criteria (elevated fasting glucose or treatment with a diabetes medication). Our results for the primary outcome of absolute and percent weight change were unchanged in the sensitivity analyses. Finally, we did not find differences between those with or without diabetes in terms of participation in the total number of intervention sessions (data not shown).

## CONCLUSIONS

People with SMI are at a higher risk of developing diabetes and obesity compared with the general population (1,2). Some evidence suggests that people with diabetes may be less successful in a behavioral weight loss intervention compared with those without diabetes (10). In the ACHIEVE randomized clinical trial, we found clear evidence that overweight and obese individuals with SMI successfully lost weight in the behavioral weight loss intervention, regardless of whether they had diabetes. Although we did not find statistically significant evidence of effect modification by diabetes status, we observed a clinically significant amount of greater weight loss in the intervention group among people with SMI and diabetes.

**Table 1—Baseline characteristics of participants in the ACHIEVE trial, stratified by diabetes status**

| Characteristic                                    | Without diabetes ( <i>n</i> = 209) | With diabetes ( <i>n</i> = 82) | <i>P</i> value |
|---------------------------------------------------|------------------------------------|--------------------------------|----------------|
| Age, years                                        | 44.1 (11.7)                        | 48.4 (9.6)                     | 0.004          |
| Male sex, <i>n</i> (%)                            | 100 (47.9)                         | 45 (54.9)                      | 0.28           |
| Weight, lb                                        | 220.4 (43.8)                       | 239.9 (50.4)                   | 0.001          |
| BMI, kg/m <sup>2</sup>                            | 35.4 (6.8)                         | 38.4 (7.9)                     | 0.002          |
| Fasting glucose, mg/dL                            | 95.8 (11.5)                        | 128.8 (51.5)                   | <0.001         |
| Race, <i>n</i> (%)                                |                                    |                                | 0.84           |
| White                                             | 118 (56.5)                         | 45 (54.9)                      |                |
| Black                                             | 78 (37.3)                          | 33 (40.2)                      |                |
| Other                                             | 13 (6.2)                           | 4 (4.9)                        |                |
| Hispanic ethnic group, <i>n</i> (%)               | 10 (4.8)                           | 3 (3.7)                        | 0.68           |
| Not a high school graduate, <i>n</i> (%)          | 53 (25.4)                          | 34 (41.5)                      | 0.02           |
| Health insurance, <i>n</i> (%)                    |                                    |                                |                |
| Medicaid                                          | 176 (84.2)                         | 64 (78.1)                      | 0.21           |
| Medicare                                          | 100 (47.9)                         | 46 (56.1)                      | 0.21           |
| Unable to work/receiving disability, <i>n</i> (%) | 164 (78.5)                         | 65 (79.3)                      | 0.88           |
| Psychiatric diagnosis, <i>n</i> (%)               |                                    |                                | 0.002          |
| Schizophrenia                                     | 49 (23.4)                          | 36 (43.9)                      |                |
| Schizoaffective disorder                          | 63 (30.1)                          | 21 (25.6)                      |                |
| Bipolar disorder                                  | 54 (25.8)                          | 10 (12.2)                      |                |
| Major depression                                  | 23 (11.0)                          | 12 (14.6)                      |                |
| Other                                             | 20 (9.6)                           | 3 (3.7)                        |                |
| Number of psychotropic medications                | 3.1 (1.3)                          | 3.1 (1.7)                      | 0.97           |
| Any antipsychotic medication, <i>n</i> (%)        | 188 (90.0)                         | 73 (89.0)                      | 0.82           |
| Atypical antipsychotic medication, <i>n</i> (%)   | 172 (82.3)                         | 69 (84.2)                      | 0.71           |
| Clozapine or olanzapine, <i>n</i> (%)             | 39 (18.7)                          | 26 (31.7)                      | 0.02           |
| Lithium or other mood stabilizer, <i>n</i> (%)    | 102 (48.8)                         | 30 (36.6)                      | 0.06           |
| Antidepressant medication, <i>n</i> (%)           | 126 (60.3)                         | 49 (59.8)                      | 0.93           |
| Current smoker, <i>n</i> (%)                      | 83 (39.7)                          | 35 (42.7)                      | 0.64           |
| Psychiatric measures                              |                                    |                                |                |
| BASIS-24 score                                    | 1.32 (0.85)                        | 1.19 (0.72)                    | 0.20           |
| CES-D score                                       | 19.8 (10.6)                        | 20.2 (12.8)                    | 0.76           |
| Have a care provider, <i>n</i> (%)                | 33 (25.0)                          | 49 (30.8)                      | 0.27           |
| Randomization group, <i>n</i> (%)                 |                                    |                                | 0.09           |
| Intervention                                      | 110 (52.6)                         | 34 (41.5)                      |                |
| Control                                           | 99 (47.4)                          | 48 (58.5)                      |                |

Data are mean (SD) unless otherwise indicated.

Although there was no statistically significant interaction between diabetes status and randomized group, the effects

in the diabetes subgroup appeared to be larger than corresponding effects in the subgroup without diabetes. The

weight loss observed in SMI patients with diabetes was clinically important. Participants in the intervention group

**Table 2—Change in weight at 18 months follow-up for participants with and without diabetes**

|                                                       | Without diabetes ( <i>n</i> = 209) | With diabetes ( <i>n</i> = 82) | <i>P</i> value, between group |
|-------------------------------------------------------|------------------------------------|--------------------------------|-------------------------------|
| Mean weight at baseline (SD), lb                      | 220.4 (43.8)                       | 239.9 (50.4)                   | 0.001                         |
| Mean weight at 18 months (SD), lb                     | 216.5 (47.1)                       | 233.8 (50.4)                   | 0.007                         |
| Mean weight change at 18 months (SE), lb*             |                                    |                                |                               |
| Control                                               | −0.8 (2.2)                         | −1.2 (2.7)                     | 0.90                          |
| Intervention                                          | −5.4 (1.3)                         | −13.7 (3.7)                    | 0.04                          |
| Net intervention effect, difference                   | −4.6 (2.6)                         | −12.5 (4.6)                    | 0.08                          |
| <i>P</i> value, within group                          | 0.07                               | 0.01                           |                               |
| % weight change at 18 months (SE), lb*                |                                    |                                |                               |
| Control                                               | −0.7 (0.9)                         | −0.6 (1.1)                     | 0.91                          |
| Intervention                                          | −2.9 (0.7)                         | −6.6 (2.0)                     | 0.08                          |
| Net intervention effect, difference                   | −2.2 (1.1)                         | −6.0 (2.3)                     | 0.10                          |
| <i>P</i> value, within group                          | 0.06                               | 0.008                          |                               |
| % achieving 5% weight loss at 18 months, <i>n</i> (%) | 58 (28.9)                          | 26 (33.3)                      | 0.46                          |

\*Longitudinal mixed-effects model based estimates, adjusted for age, sex, and site.

**Table 3—Change in glucose and waist circumference at 18 months follow-up for participants with and without diabetes**

|                                                          | Without diabetes (n = 209) | With diabetes (n = 82) | P value, between group |
|----------------------------------------------------------|----------------------------|------------------------|------------------------|
| <b>Glucose</b>                                           |                            |                        |                        |
| Mean fasting glucose at baseline (SD), mg/dL             | 95.8 (11.5)                | 128.8 (51.5)           | <0.001                 |
| Mean fasting glucose at 18 months (SD), mg/dL            | 100.6 (21.2)               | 124.5 (51.0)           | <0.001                 |
| Mean change in fasting glucose at 18 months (SE), mg/dL* |                            |                        |                        |
| Control                                                  | 6.4 (2.8)                  | 2.9 (11.6)             | 0.77                   |
| Intervention                                             | 3.6 (2.2)                  | −13.9 (11.3)           | 0.13                   |
| Net intervention effect, difference                      | −2.8 (3.5)                 | −16.8 (16.3)           | 0.68                   |
| P value, within group                                    | 0.43                       | 0.30                   |                        |
| <b>Waist circumference</b>                               |                            |                        |                        |
| Mean waist circumference at baseline (SD), cm            | 114.2 (14.9)               | 124.2 (14.9)           | <0.001                 |
| Mean waist circumference at 18 months (SD), cm           | 112.6 (17.0)               | 123.4 (18.2)           | <0.001                 |
| Change in waist circumference (SE), cm*                  |                            |                        |                        |
| Control                                                  | −0.6 (0.9)                 | 0.1 (1.5)              | 0.67                   |
| Intervention                                             | −1.9 (0.8)                 | −3.3 (2.0)             | 0.52                   |
| Net intervention effect, difference                      | −1.3 (1.2)                 | −3.4 (2.5)             | 0.53                   |
| P value, within group                                    | 0.30                       | 0.18                   |                        |

\*Longitudinal mixed-effects model–based estimates, adjusted for time-dependent weight, age, sex, site, psychiatric diagnosis, and baseline weight.

who had diabetes lost on average 6.6% of their initial body weight, which is similar to the 5–10% range seen in behavioral weight loss interventions in the general population (19). We speculate that the substantial weight loss success among those with diabetes in the intervention group may be because they were aware that they had diabetes and understood the importance of lifestyle change. In additional analyses examining attendance, we did not find differences between the two groups in terms of participation in the intervention sessions (individual and group).

Prior studies that included people with diabetes in the general population have demonstrated mixed results on the success of weight loss interventions. Many of these studies were nonrandomized and 1 year in duration or shorter. These study findings may have been mixed partly because diabetes medications have different effects on weight, with some promoting weight gain and others promoting weight loss. Only a few studies adjusted for diabetes medication use, and when they did, it was not by the specific type of diabetes medication. In a 26-week prospective cohort study, individuals with diabetes lost less weight in a standardized clinical meal replacement and lifestyle modification program compared with individuals with impaired fasting glucose or no diabetes (10). Similarly, in a 20-week behavioral weight-control program, 12 participants with diabetes lost significantly less weight than their spouses without diabetes, and this difference was not explained by use of oral diabetes medication (11).

However, other studies showed that weight loss is similar among people with or without diabetes following low calorie diets with behavior therapy (12–14). In another prospective non-randomized study, women with or without diabetes lost the same amount of weight in a 16-week behavioral weight loss program (15). Few randomized trials that include people with diabetes have reported intervention effects separately for the subgroup with diabetes. In the Heart Healthy Lenoir Project Phase III year-long randomized controlled trial, participants with diabetes lost significantly more weight than participants without diabetes, but these data were reported across all intervention groups and did not include a control group (16).

To our knowledge, no studies have examined the success of people with SMI who have diabetes in weight loss interventions. One study conducted a secondary analysis that investigated weight loss among veterans with prediabetes enrolled in a Diabetes Prevention Program demonstrating that veterans with SMI lost less weight over 6 months compared with veterans with affective disorder (included depression and anxiety disorders) or veterans without SMI or affective disorder (−1.5 kg in SMI group vs. −3.9 kg in affective disorder group and −3.7 kg in no SMI/no affective disorder group), although this trend was not significant at 12 months (20).

Our study supports prior evidence that antipsychotic use is associated with a higher prevalence of metabolic syndrome and diabetes (21). In our study population, a higher proportion

of participants with diabetes were receiving the second-generation antipsychotics olanzapine or clozapine, which are well-known to contribute to weight gain and abnormalities in glucose metabolism (22). A large cohort study estimated that the diabetes prevalence in antipsychotic-treated patients with SMI was between 17.3% and 28.1%, which is nearly twice the prevalence in the general population (23). Despite the documented side effects of these medications, in ACHIEVE, participants with diabetes in the intervention group appeared to have a lower fasting glucose on average by 14 mg/dL and waist circumference by 3.3 cm in analyses adjusted for time-dependent weight to account for effects mediated through weight change, although these were not statistically significant.

The strengths of our study include enrollment of an important but understudied population that included substantial numbers of patients with SMI and diabetes. The trial was well conducted with 18 months of follow-up and few missing data. In contrast, prior studies examining weight loss interventions in people with SMI were short ( $\leq 6$  months), uncontrolled, and with small samples (24,25). Furthermore, results were robust in a variety of sensitivity analyses that used advanced analytic methods.

Our study also has several limitations. First, the ACHIEVE trial was not powered for this subgroup analysis, so the study sample size was not sufficient to confirm the difference as observed between those with and without diabetes. Second,

our definition of diabetes included self-reported diabetes, a single fasting glucose level  $\geq 126$  mg/dL, or use of any diabetes medications. It is unclear if use of self-reported diabetes in the SMI population is reliable. However, in our sensitivity analysis, we found that results for the primary outcome of absolute weight loss were unchanged. Additionally, we did not have hemoglobin A<sub>1c</sub> data available, and fasting glucose has high variability related to differences in fasting time before testing, medications, activity, and stress (26). Therefore, misclassification of diabetes status may have occurred.

In conclusion, overweight and obese individuals with SMI successfully lost weight in the ACHIEVE behavioral weight loss intervention regardless of whether they had diabetes. This finding is important because of the substantial burden of diabetes in patients with SMI and the dearth of information on the effectiveness of weight loss interventions in SMI patients with diabetes. Our results suggest that the behavioral weight loss intervention tested in the ACHIEVE trial could produce as large or greater weight loss in those with versus without diabetes in the population of people with SMI. However, larger studies are needed to confirm this hypothesis. Nonetheless, with effective behavioral weight loss interventions like the one developed and tested in the ACHIEVE trial, we may be able to substantially improve the health of this vulnerable and understudied population.

**Funding.** This study was supported by the National Institute of Mental Health (R01MH080964, K24MH09373, and P50MH115842 to G.L.D. and R01MH080964 and P50MH115842 to N.-Y.W.) and the National Institute of Diabetes and Digestive and Kidney Diseases (P30DK079637 to N.-Y.W.).

**Duality of Interest.** No potential conflicts of interest relevant to this article were reported.

**Author Contributions.** E.T. analyzed the data and wrote the manuscript. A.T.D., G.J.J., and S.G. contributed to the randomized clinical trial and intervention design and implementation and reviewed and edited the manuscript. J.V.G. was responsible for all data collection and quality and reviewed and edited the manuscript. C.C. was responsible for data quality and data management and reviewed and edited the manuscript. L.J.A. contributed to the randomized clinical trial design and oversight and reviewed and edited the manuscript. N.M.M. reviewed and edited the manuscript. G.L.D. procured the funding, led and supervised all aspects of the randomized trial, contributed to the introduction,

methods, and discussion, and reviewed and edited the manuscript. N.-Y.W. developed the research question, guided the data analyses, and reviewed and edited the manuscript. E.T. is the guarantor of this work and, as such, had full access to all the data in the study and takes responsibility for the integrity of the data and the accuracy of the data analysis.

## References

- Allison DB, Newcomer JW, Dunn AL, et al. Obesity among those with mental disorders: a National Institute of Mental Health meeting report. *Am J Prev Med* 2009;36:341–350
- Janssen E, McGinty E, Azrin S, Juliano-Bult D, Daumit G. Review of the evidence: prevalence of medical conditions in the United States population with serious mental illness. *Gen Hosp Psychiatry* 2015;37:199–222
- Voruganti LP, Punthakee Z, Van Lieshout RJ, et al. Dysglycemia in a community sample of people treated for schizophrenia: the Diabetes in Schizophrenia in Central-South Ontario (DISCO) study. *Schizophr Res* 2007;96:215–222
- Holt RI, Mitchell AJ. Diabetes mellitus and severe mental illness: mechanisms and clinical implications. *Nat Rev Endocrinol* 2015;11:79–89
- Chwastiak LA, Rosenheck RA, Kazis LE. Association of psychiatric illness and obesity, physical inactivity, and smoking among a national sample of veterans. *Psychosomatics* 2011;52:230–236
- Spelman LM, Walsh PI, Sharifi N, Collins P, Thakore JH. Impaired glucose tolerance in first-episode drug-naïve patients with schizophrenia. *Diabet Med* 2007;24:481–485
- Vancampfort D, Wampers M, Mitchell AJ, et al. A meta-analysis of cardio-metabolic abnormalities in drug naïve, first-episode and multi-episode patients with schizophrenia versus general population controls. *World Psychiatry* 2013;12:240–250
- American Diabetes Association. 4. Lifestyle management: *Standards of Medical Care in Diabetes—2018*. *Diabetes Care* 2018;41(Suppl. 1):S38–S50
- Pi-Sunyer FX. Weight loss in type 2 diabetic patients. *Diabetes Care* 2005;28:1526–1527
- Antoun G, Nikpay M, McPherson R, Harper ME, Dent R. Is type 2 diabetes in adults associated with impaired capacity for weight loss? *Can J Diabetes* 2018;42:313.e1–316.e1
- Wing RR, Marcus MD, Epstein LH, Salata R. Type II diabetic subjects lose less weight than their overweight nondiabetic spouses. *Diabetes Care* 1987;10:563–566
- Leslie WS, Taylor R, Harris L, Lean ME. Weight losses with low-energy formula diets in obese patients with and without type 2 diabetes: systematic review and meta-analysis [published correction appears in *Int J Obes (Lond)* 2017;41:997]. *Int J Obes (Lond)* 2017;41:96–101
- Li Z, Tseng CH, Li Q, Deng ML, Wang M, Heber D. Clinical efficacy of a medically supervised outpatient high-protein, low-calorie diet program is equivalent in prediabetic, diabetic and normoglycemic obese patients. *Nutr Diabetes* 2014;4:e105
- Rolland C, Lula S, Jenner C, et al. Weight loss for individuals with type 2 diabetes following

a very-low-calorie diet in a community-based setting with trained facilitators for 12 weeks. *Clin Obes* 2013;3:150–157

- Guare JC, Wing RR, Grant A. Comparison of obese NIDDM and nondiabetic women: short- and long-term weight loss. *Obes Res* 1995;3:329–335
- Embree GG, Samuel-Hodge CD, Johnston LF, et al. Successful long-term weight loss among participants with diabetes receiving an intervention promoting an adapted Mediterranean-style dietary pattern: the Heart Healthy Lenoir Project. *BMJ Open Diabetes Res Care* 2017;5:e000339
- Daumit GL, Dickerson FB, Wang NY, et al. A behavioral weight-loss intervention in persons with serious mental illness. *N Engl J Med* 2013;368:1594–1602
- Casagrande SS, Jerome GJ, Dalcin AT, et al. Randomized trial of achieving healthy lifestyles in psychiatric rehabilitation: the ACHIEVE trial. *BMC Psychiatry* 2010;10:108
- Jensen MD, Ryan DH, Apovian CM, et al.; American College of Cardiology/American Heart Association Task Force on Practice Guidelines; Obesity Society. 2013 AHA/ACC/TOS guideline for the management of overweight and obesity in adults: a report of the American College of Cardiology/American Heart Association Task Force on Practice Guidelines and the Obesity Society. *J Am Coll Cardiol* 2014;63:2985–3023
- Janney CA, Greenberg JM, Moin T, et al. Does mental health influence weight loss in adults with prediabetes? Findings from the VA Diabetes Prevention Program. *Gen Hosp Psychiatry* 2018;53:32–37
- McEvoy JP, Meyer JM, Goff DC, et al. Prevalence of the metabolic syndrome in patients with schizophrenia: baseline results from the Clinical Antipsychotic Trials of Intervention Effectiveness (CATIE) schizophrenia trial and comparison with national estimates from NHANES III. *Schizophr Res* 2005;80:19–32
- American Diabetes Association; American Psychiatric Association; American Association of Clinical Endocrinologists; North American Association for the Study of Obesity. Consensus development conference on antipsychotic drugs and obesity and diabetes. *J Clin Psychiatry* 2004;65:267–272
- Mangurian CV, Schillinger D, Newcomer JW, et al. Diabetes and prediabetes prevalence by race and ethnicity among people with severe mental illness. *Diabetes Care* 2018;41:e119–e120
- Verhaeghe N, De Maesseneer J, Maes L, Van Heeringen C, Annemans L. Effectiveness and cost-effectiveness of lifestyle interventions on physical activity and eating habits in persons with severe mental disorders: a systematic review. *Int J Behav Nutr Phys Act* 2011;8:28
- Cabassa LJ, Ezell JM, Lewis-Fernández R. Lifestyle interventions for adults with serious mental illness: a systematic literature review. *Psychiatr Serv* 2010;61:774–782
- Selvin E, Crainiceanu CM, Brancati FL, Coresh J. Short-term variability in measures of glycemia and implications for the classification of diabetes. *Arch Intern Med* 2007;167:1545–1551
